# Supplementary material
Source: Springer Nature journal article supplement (https://www.springermedizin.de/resource/supplementary/12885_2012_3868_MOESM1_ESM.pdf/9464654)

**(A)**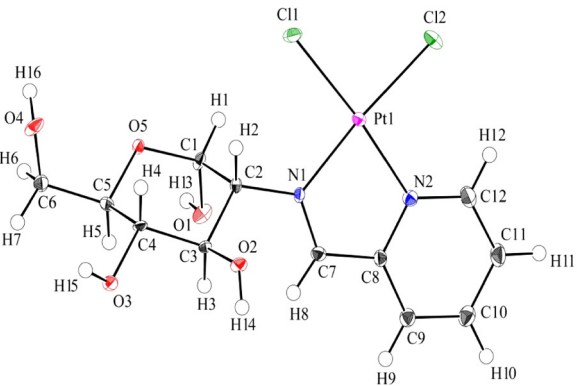 $[\text{PtCl}_2(\text{L})]$ **(B)**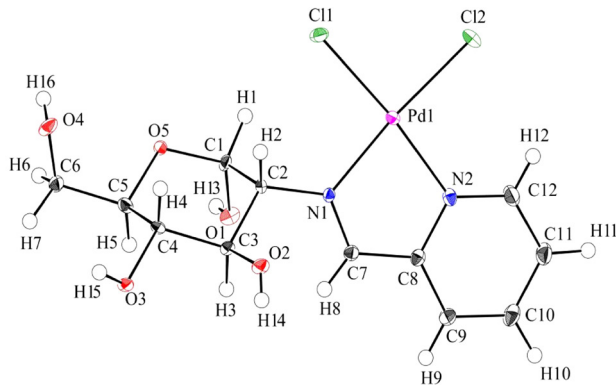 $[\text{PdCl}_2(\text{L})]$

Supplement: MOESM1 [file 9464654]
